# Supplementary material for: Tuning the Activity of a Hybrid Polymer–Oxocluster Catalyst: A Composition—Selectivity Correlation
Source: MDPI journal article supplement (doi:10.3390/polym13193268), 2021-09-25
Supplement: s1 [file s1]

## Supporting information

*Giulia Bragaglia<sup>a,b</sup>, Anna Beghetto<sup>a</sup>, Ferdinando Bassato<sup>a,b</sup>, Rudi Reichenbacher<sup>a,c</sup>, Paolo Dolcet<sup>a,b,e</sup>, Mauro Carraro\*<sup>a,d</sup>, Silvia Gross\*<sup>a,b,e</sup>*

<sup>a</sup>Dipartimento di Scienze Chimiche, Università degli Studi di Padova, via Marzolo 1, 35131 Padova, Italy

<sup>b</sup>INSTM, Consorzio Interuniversitario per la Scienza e Tecnologia dei Materiali, via Giusti 9, 50121, Firenze, Italy

<sup>c</sup>Technische Universität Dresden, Helmholtzstr. 10, 01069 Dresden Germany

<sup>d</sup>Istituto per la Tecnologia delle membrane, ITM-CNR via Marzolo 1, I-35131, Padova, Italy

<sup>e</sup>Karlsruher Institut für Technologie (KIT), Institut für Technische Chemie und Polymerchemie, Engesserstr. 20, 76131 Karlsruhe, Germany

\*E-mail: mauro.carraro@unipd.it; silvia.gross@unipd.it.

## Index

|                                           |          |
|-------------------------------------------|----------|
| <i>FT-IR analysis .....</i>               | <i>3</i> |
| <i>Raman mapping.....</i>                 | <i>4</i> |
| <i>TGA analysis.....</i>                  | <i>5</i> |
| <i>Catalytic tests.....</i>               | <i>6</i> |
| <i>X-ray absorption spectroscopy.....</i> | <i>7</i> |
| <i>Recycles tests .....</i>               | <i>7</i> |
| <i>SEM-EDX measurements.....</i>          | <i>8</i> |

FT-IR analysis

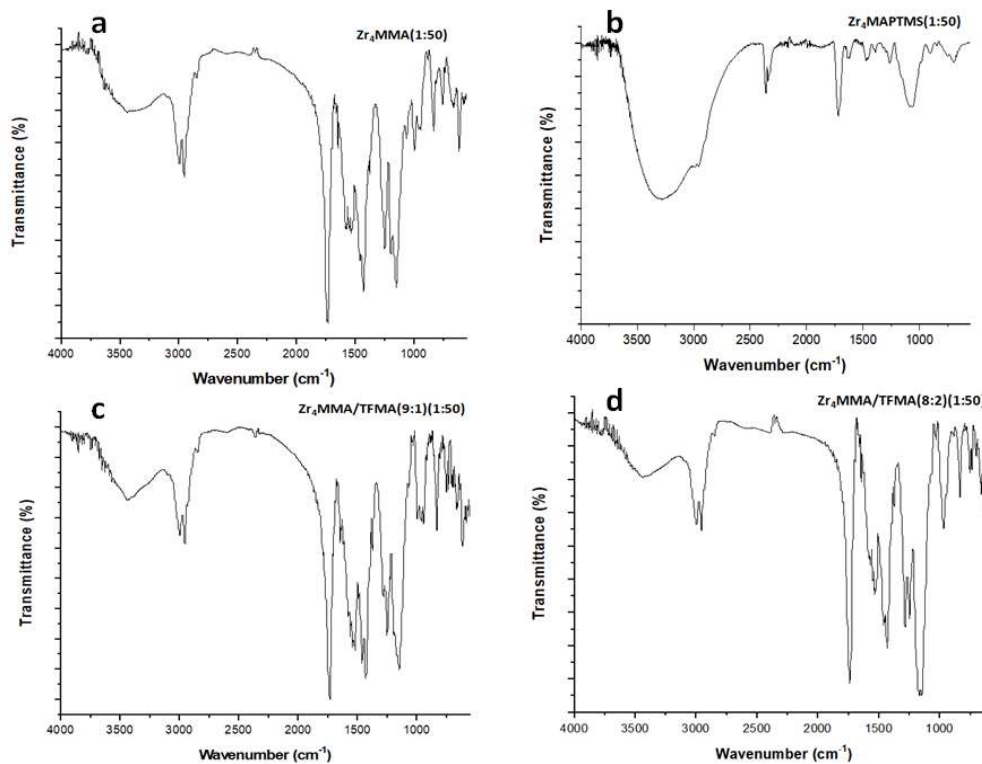

**Figure S1.** FT-IR spectra of the samples: a)  $\text{Zr}_4\text{MMA}(1:50)$ , b)  $\text{Zr}_4\text{MAPTMS}(1:50)$ , c)  $\text{Zr}_4\text{MMA}/\text{TFMA}(9:1)(1:50)$ , d)  $\text{Zr}_4\text{MMA}/\text{TFMA}(8:2)(1:50)$ .

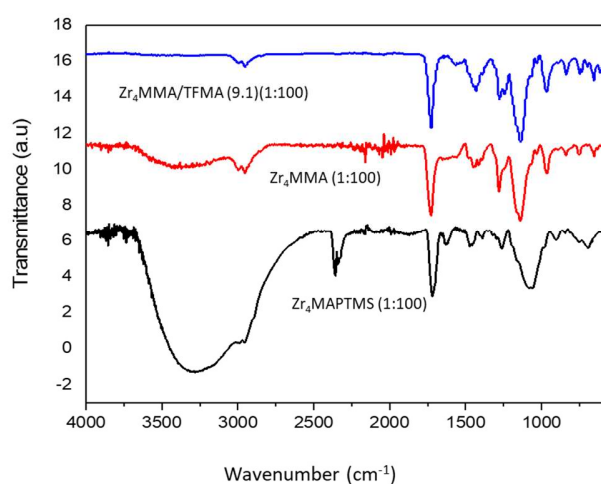

**Figure S2.** Full scale of the spectra reported in Figure 2.

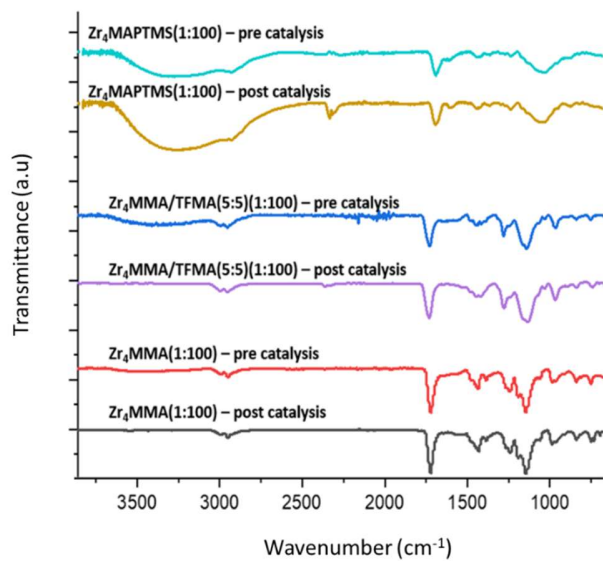

**Figure S3.** FT-IR analysis of Zr<sub>4</sub>MMA(1:100), Zr<sub>4</sub>MMA/TFMA(5:5)(1:100) and Zr<sub>4</sub>MAPTMS(1:100) before and after catalysis.

#### *Raman mapping*

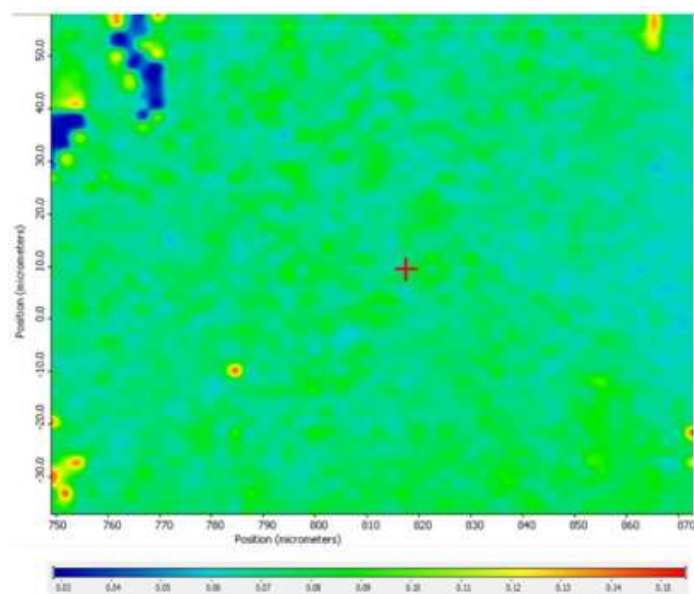

**Figure S4.** Raman mapping of Zr<sub>4</sub>MMA(1:100), collected in a region of 150 x 200  $\mu\text{m}$  and with a power of 8 mW.

## TGA analysis

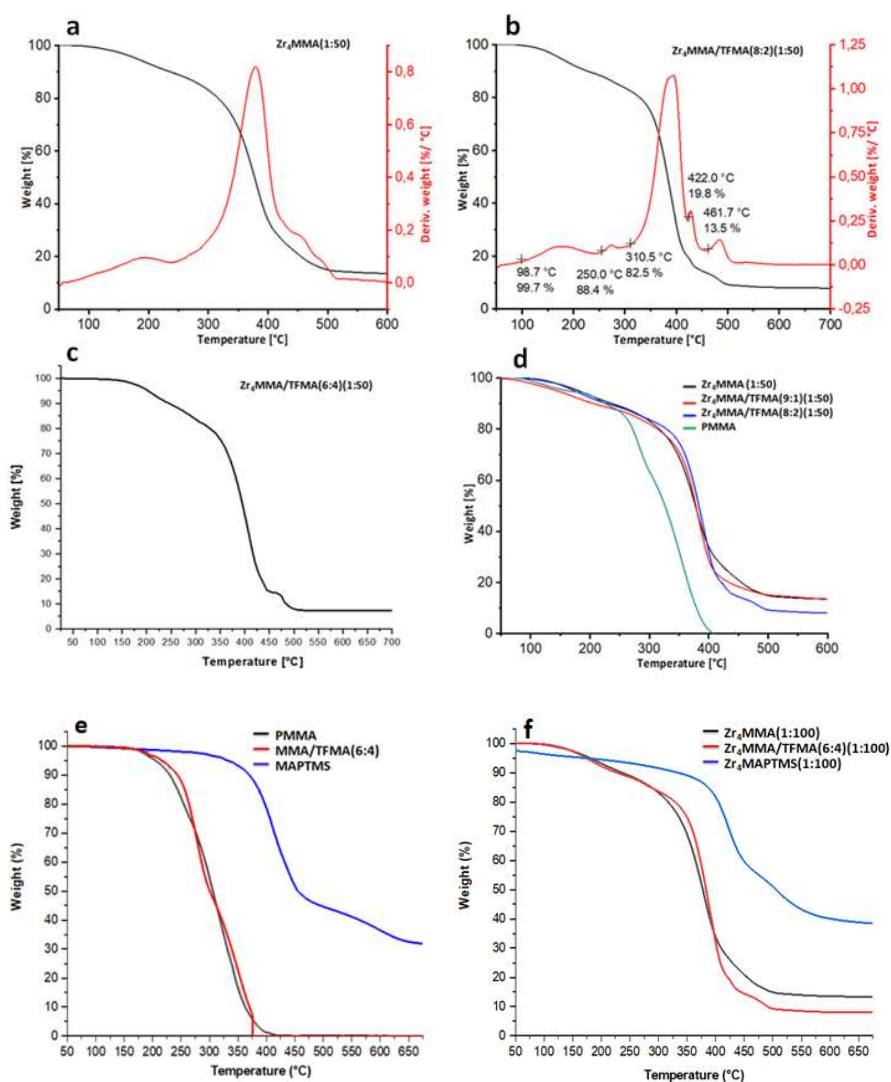

**Figure S5.** TGA analyses of the samples: a)  $\text{Zr}_4\text{MMA}(1:50)$ , b)  $\text{Zr}_4\text{MMA}/\text{TFMA}(8:2)(1:50)$ , c)  $\text{Zr}_4\text{MMA}(6:4)(1:50)$ , d) comparison between three polymers,  $\text{Zr}_4\text{MMA}(1:50)$ ,  $\text{Zr}_4\text{MMA}/\text{TFMA}(9:1)(1:50)$  and  $\text{Zr}_4\text{MMA}/\text{TFMA}(8:2)(1:50)$  and PMMA, e) comparison between three blanks, PMMA, MMA/TFMA (6:4) and MAPTMS, f) comparison between three polymers,  $\text{Zr}_4\text{MMA}(1:100)$ ,  $\text{Zr}_4\text{MMA}/\text{TFMA}(6:4)(1:100)$  and  $\text{Zr}_4\text{MAPTMS}(1:100)$ , whose calculations are reported in Table 2. The TGA were collected with a ramp of  $10^\circ\text{C}/\text{min}$  from room temperature ( $25^\circ\text{C}$ ) up to  $900^\circ\text{C}$ , under air flow.

### Catalytic tests

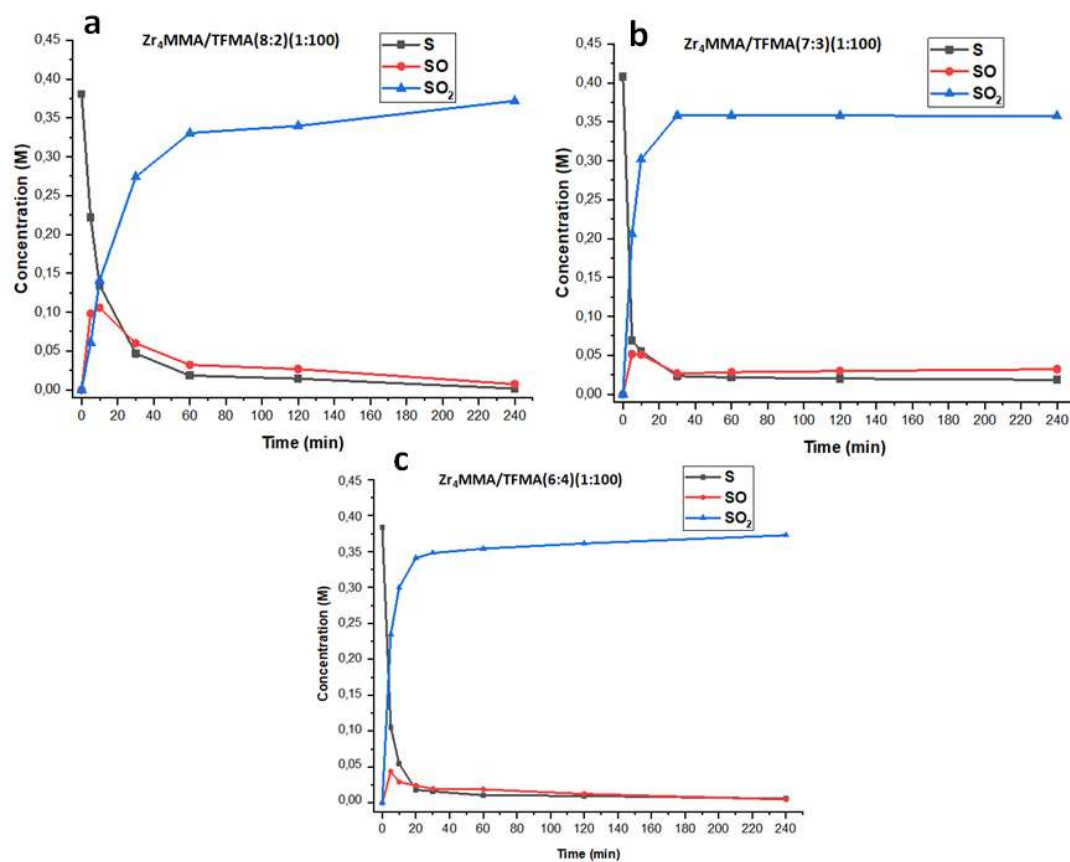

**Figure S6.** Catalytic tests on the following hybrids: a) Zr<sub>4</sub>MMA/TFMA(8:2)(1:100), b) Zr<sub>4</sub>MMA/TFMA(7:3)(1:100), c) Zr<sub>4</sub>MMA/TFMA(6:4)(1:100). The tests were performed under diluted conditions: 0.40 M sulphide, 0.81 M H<sub>2</sub>O<sub>2</sub> in 2.2 mL of ACN.

### *X-ray absorption spectroscopy*

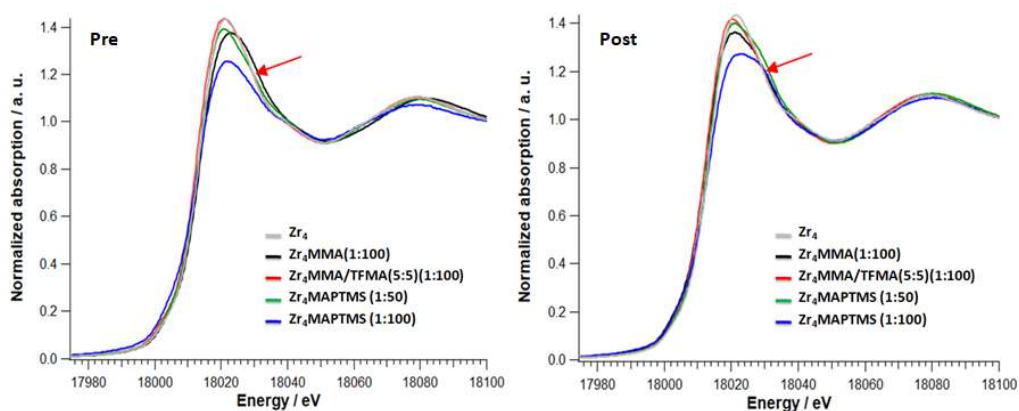

**Figure S7.** Zr K-edge XANES spectra of samples before (left) and after (right) catalysis. The arrows indicate the isosbestic point.

### *Recycles tests*

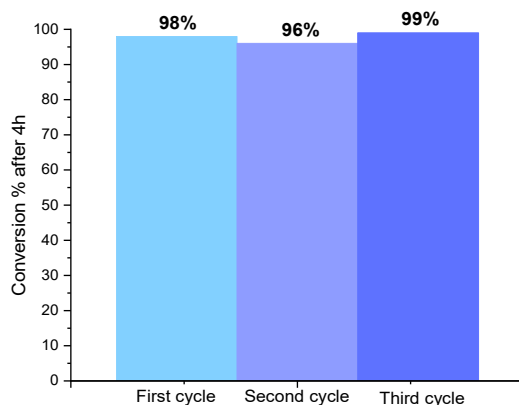

**Figure S8.** Recycles tests on the best synthesised heterogeneous catalysts  $Zr_3MMA/TFMA(5:5)(1:100)$ : after the first cycle a conversion of 98% can be observed and a conversion of 96% and 99% after the second and the third catalytic recycles can be pointed out, highlighting the high stability of the samples even after tree catalytic cycles. The tests were performed for 4 hours under the same diluted conditions of 0.40 M sulphide, 0.81 M  $H_2O_2$  in 2.2 mL of ACN, by recycling the catalyst.

SEM-EDX measurements

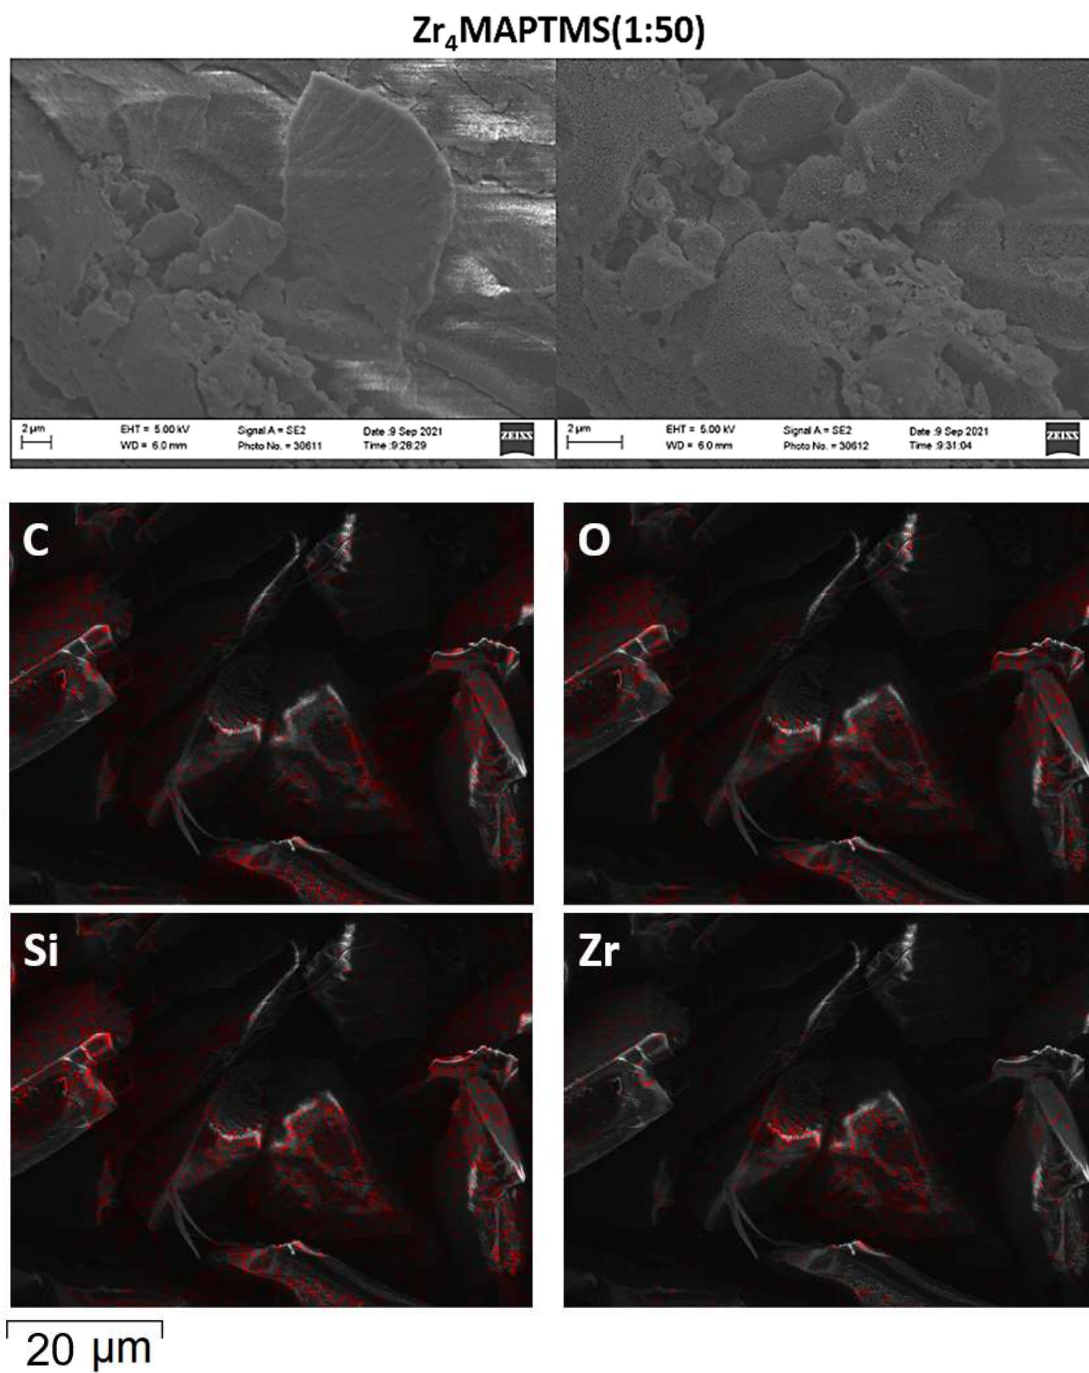

**Figure S9:** SEM-EDX measurements of Zr<sub>4</sub>MAPTMS(1:50).



### $\text{Zr}_4\text{MAPTMS}(1:100)$

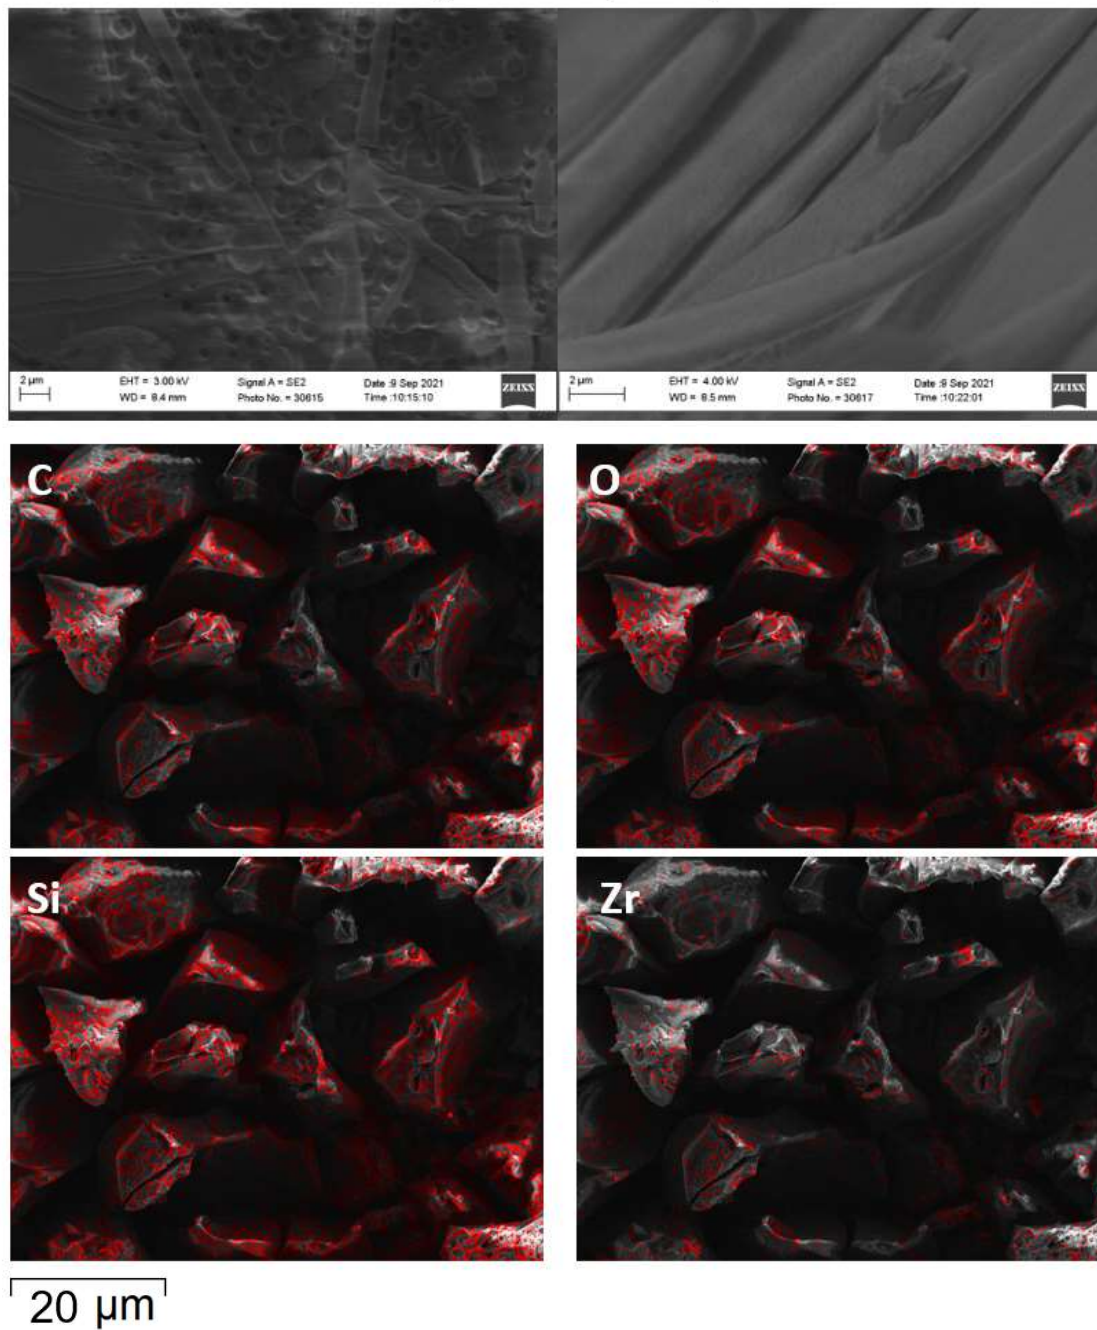

**Figure S10:** SEM-EDX measurements of  $\text{Zr}_4\text{MAPTMS}(1:100)$ .

**Zr<sub>4</sub>MMA/TFMA(9:1)(1:100)**

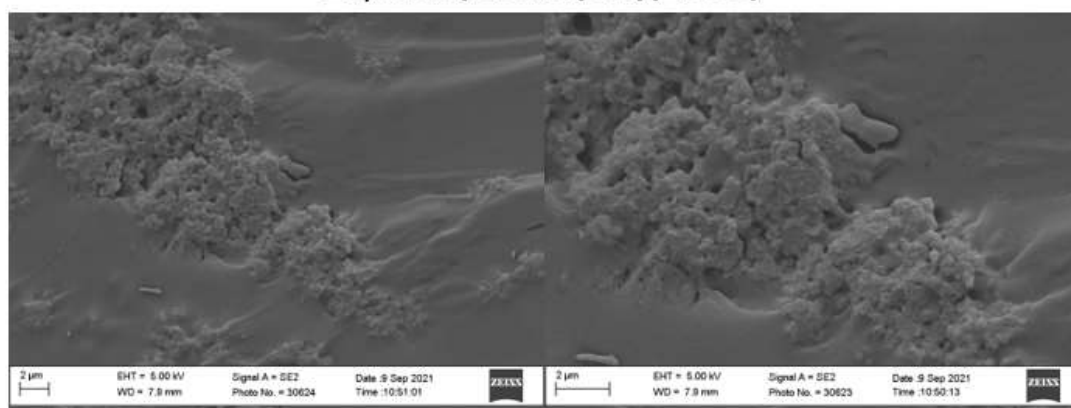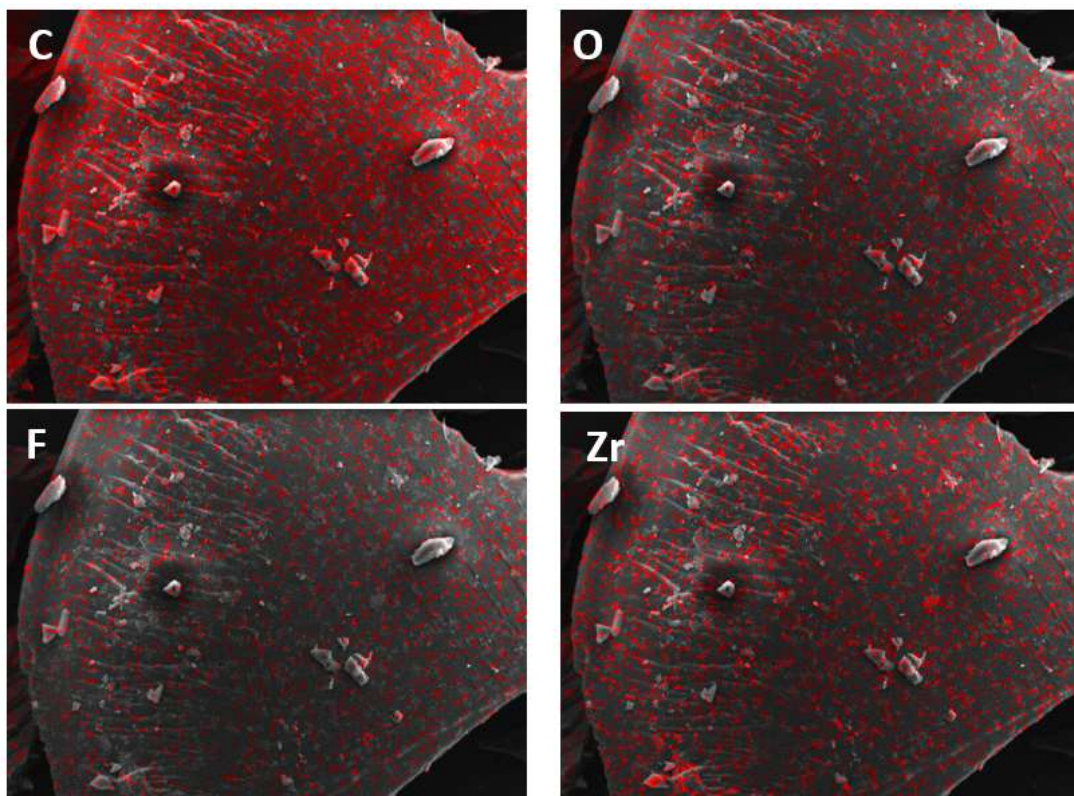

20 μm

**Figure S11:** SEM-EDX measurements of Zr<sub>4</sub>MMA/TFMA(9:1)(1:100).

# **Zr<sub>4</sub>MMA/TFMA(5:5)(1:100)\_pre catalysis**

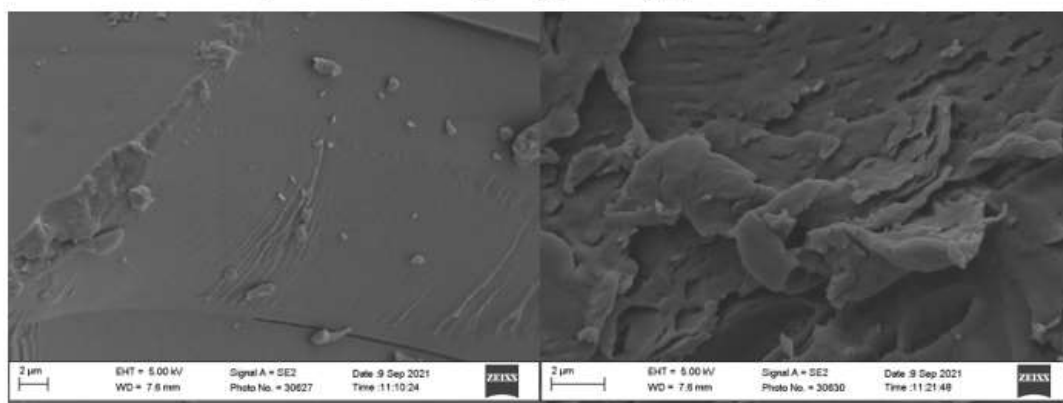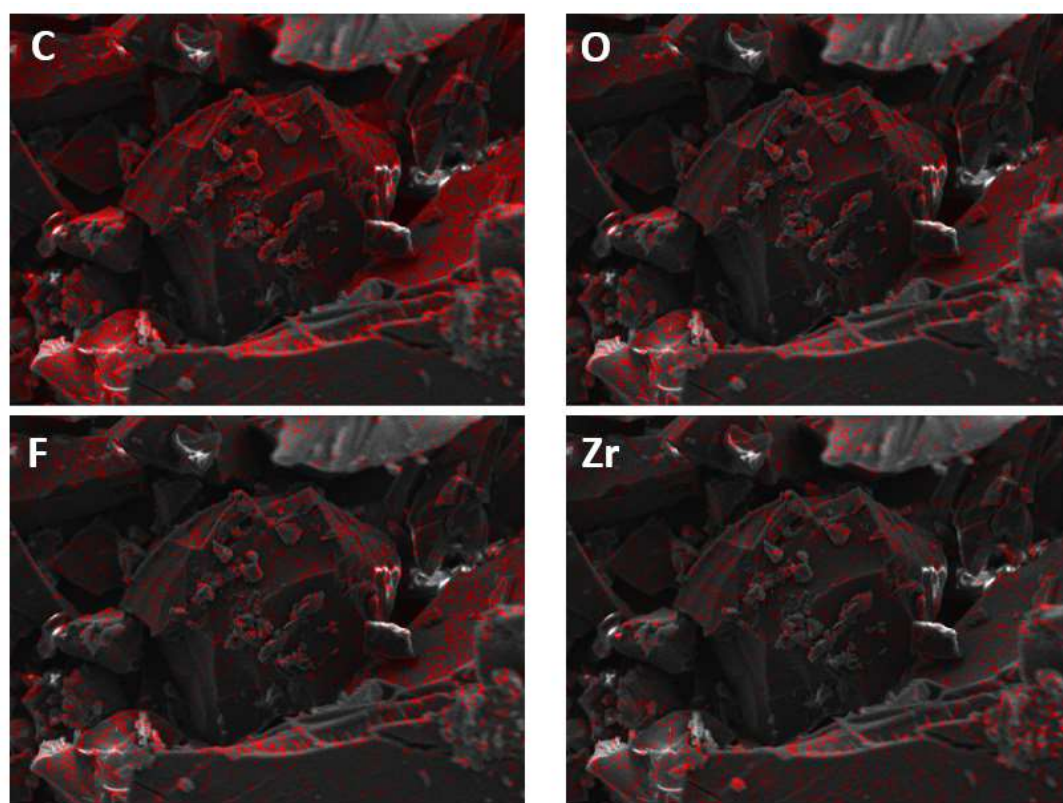

**Figure S12:** SEM-EDX measurements of Zr<sub>4</sub>MMA/TFMA(5:5)(1:100) before the catalysis.



**Zr<sub>4</sub>MMA/TFMA(5:5)(1:100)\_post catalysis**

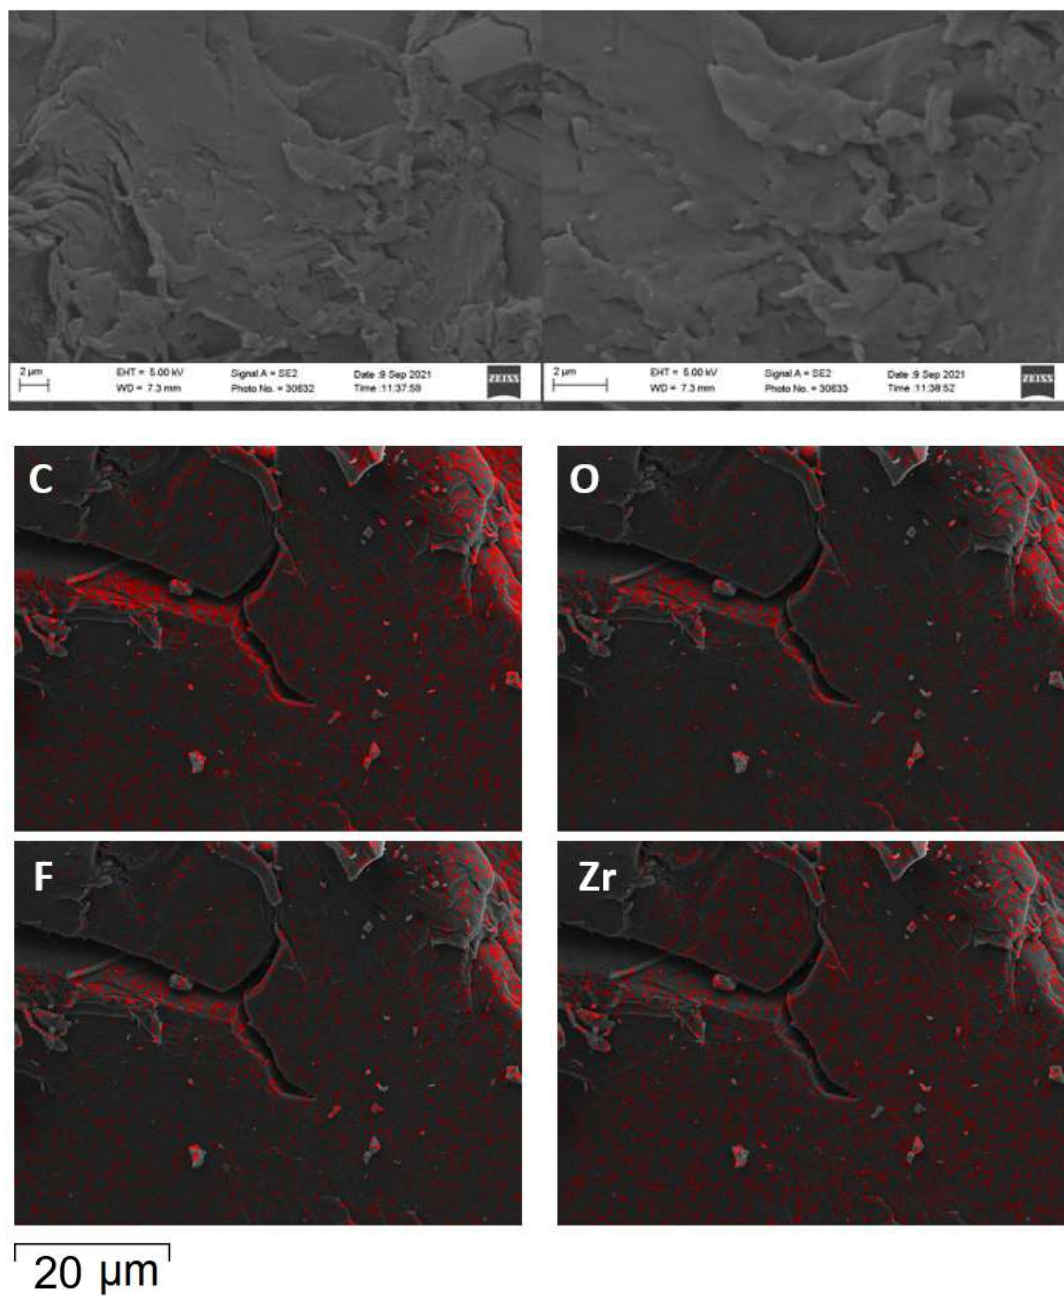

**Figure S13:** SEM-EDX measurements of Zr<sub>4</sub>MMA/TFMA(5:5)(1:100) after the catalysis.

|                              | Zr (% wt.)  |
|------------------------------|-------------|
| Zr4MMA/TFMA(5:5)(1:100)_pre  | 1,97 ± 0,21 |
| Zr4MMA/TFMA(5:5)(1:100)_post | 1,16 ± 0,62 |

**Table S1:** Semi-quantitative data from EDX measurements regarding the Zr-content in the Zr<sub>4</sub>MMA/TFMA(5:5)(1:100) before and after the catalytic oxidation.
